# Supplementary material for: Phylogenetic and Timescale Analysis of Barmah Forest Virus as Inferred from Genome Sequence Analysis
Source: Viruses. 2020 Jul 6;12(7):732. doi: 10.3390/v12070732 (PMC7412159; doi:10.3390/v12070732)
Supplement: Supplementary file 1 [file viruses-12-00732-s001.pdf]

Supplementary

# Phylogenetic and Timescale Analysis of Barmah Forest Virus as Inferred from Genome Sequence Analysis

Alice Michie <sup>1</sup>, Timo Ernst <sup>1</sup>, I-Ly Joanna Chua <sup>2</sup>, Michael D. A. Lindsay <sup>3</sup>, Peter J. Neville <sup>3</sup>, Jay Nicholson <sup>3</sup>, Andrew Jardine <sup>3</sup>, John S. Mackenzie <sup>2,4,5</sup>, David W. Smith <sup>2</sup> and Allison Imrie <sup>1,\*</sup>

<sup>1</sup> School of Biomedical Sciences, University of Western Australia, Nedlands 6009, Australia; alice.michie@uwa.edu.au (A.M.); timo.ernst@uwa.edu.au (T.E.)

<sup>2</sup> PathWest Laboratory Medicine Western Australia, Perth 6000, Australia; joanna.chua@health.uwa.edu.au (I-L.J.C.); j.mackenzie@curtin.edu.au (J.S.M.); david.smith@health.wa.gov.au (D.W.S.)

<sup>3</sup> Environmental Health Hazards, Department of Health, Perth 6000, Western Australia, Australia; michael.lindsay@health.wa.gov.au (M.D.A.L.); peter.neville@health.wa.gov.au (P.J.N.); jay.nicholson@health.wa.gov.au (J.N.); andrew.jardine@health.wa.gov.au (A.J.)

<sup>4</sup> Faculty of Health Sciences, Curtin University, Bentley 6102, Western Australia, Australia

<sup>5</sup> School of Chemistry and Molecular Biosciences, University of Queensland, St Lucia 4067, Australia

\* Correspondence: Allison.imrie@uwa.edu.au; Tel.: +61406610730

Received: 11 May 2020; Accepted: 4 July 2020; Published: date

**Abstract:** Barmah Forest virus (BFV) is a medically important mosquito-borne alphavirus endemic to Australia. Symptomatic disease can be a major cause of morbidity, associated with fever, rash, and debilitating arthralgia. BFV disease is similar to that caused by Ross River virus (RRV), the other major Australian alphavirus. Currently, just four BFV whole-genome sequences are available with no genome-scale phylogeny in existence to robustly characterise genetic diversity. Thirty novel genome sequences were derived for this study, for a final 34-taxon dataset sampled over a 44 year period. Three distinct BFV genotypes were characterised (G1–3) that have circulated in Australia and Papua New Guinea (PNG). Evidence of spatio-temporal co-circulation of G2 and G3 within regions of Australia was noted, including in the South West region of Western Australia (WA) during the first reported disease outbreaks in the state’s history. Compared with RRV, the BFV population appeared more stable with less frequent emergence of novel lineages. Preliminary in vitro assessment of RRV and BFV replication kinetics found that RRV replicates at a significantly faster rate and to a higher, more persistent titre compared with BFV, perhaps indicating mosquitoes may be infectious with RRV for longer than with BFV. This investigation resolved a greater diversity of BFV, and a greater understanding of the evolutionary dynamics and history was attained.

**Keywords:** Australia; alphavirus; arbovirus; evolutionary analysis; phylogeny

**Supplementary Table 1.** Metadata of viruses sequenced for this study, including the isolation location, date, species from which the virus was isolated and the NCBI accession number. Ae.; Aedes, Cx.; Culex.

| Isolate Name | Location of Collection          | Collection Date | Source Species                     | Accession Number |
|--------------|---------------------------------|-----------------|------------------------------------|------------------|
| DC30314      | Western Australia, Murray       | 12/12/2000      | <i>Aedes vigilax</i>               | MN689021         |
| DC45960      | Western Australia, Murray       | 11/11/2008      | <i>Ae. camptorhynchus</i>          | MN689022         |
| DC56192      | Western Australia, Harvey       | 29/1/2013       | <i>Ae. vigilax</i>                 | MN689023         |
| DC57911      | Western Australia, Mandurah     | 29/10/2019      | <i>Ae. camptorhynchus</i>          | MN689024         |
| EGR27629     | New South Wales                 | 2014            | <i>Macropus giganteus</i>          | MN689025         |
| K60652       | Western Australia, Wyndham      | 2006            | Unknown mosquito species           | MN689026         |
| K61404       | Western Australia, Derby        | 2006            | <i>Ae. normanensis</i>             | MN689027         |
| K67171       | Western Australia, Wyndham      | 2008            | <i>Culex annulirostris</i>         | MN689028         |
| K67289       | Western Australia, Parrys Creek | 2008            | Unknown mosquito species           | MN689029         |
| K80639       | Western Australia, Willie Creek | 2013            | Unknown mosquito species           | MN689030         |
| KO376-1      | Western Australia, Kununurra    | 1980            | <i>Mansonia uniformis</i>          | MN689031         |
| SW26969      | Western Australia, Cockburn     | 6/1/1993        | <i>Cx. annulirostris</i>           | MN689032         |
| SW28057      | Western Australia, Rockingham   | 4/1/1993        | <i>Coquiellidia linealis</i> -like | MN689033         |
| SW31286      | Western Australia, Mandurah     | 5/8/1993        | <i>Ae. camptorhynchus</i>          | MN689034         |
| SW35221      | Western Australia, Capel        | 15/11/1993      | <i>Ae. camptorhynchus</i>          | MN689035         |
| SW67821      | Western Australia, Busselton    | 5/11/2001       | <i>Ae. camptorhynchus</i>          | MN689036         |
| SW68009      | Western Australia, Busselton    | 26/11/2001      | <i>Ae. camptorhynchus</i>          | MN689037         |
| SW75325      | Western Australia, Busselton    | 2/8/2005        | <i>Ae. camptorhynchus</i>          | MN689038         |
| SW76326      | Western Australia, Harvey       | 25/10/2005      | <i>Ae. camptorhynchus</i>          | MN689039         |
| SW77318      | Western Australia, Busselton    | 3/1/2006        | <i>Ae. camptorhynchus</i>          | MN689040         |
| SW93518      | Western Australia, Busselton    | 11/9/2012       | <i>Ae. camptorhynchus</i>          | MN689041         |
| SW94096      | Western Australia, Capel        | 23/10/2012      | <i>Ae. camptorhynchus</i>          | MN689042         |
| SW94393      | Western Australia, Capel        | 20/11/2012      | <i>Ae. camptorhynchus</i>          | MN689043         |
| SW94457      | Western Australia, Harvey       | 4/12/2012       | <i>Ae. camptorhynchus</i>          | MN689044         |
| SW97836      | Western Australia, Dardanup     | 4/2/2014        | <i>Ae. alboannulatus</i>           | MN689045         |
| SW105045     | Western Australia, Harvey       | 26/9/2017       | <i>Ae. camptorhynchus</i>          | MN689046         |
| SW105961     | Western Australia, Harvey       | 16/11/2017      | <i>Ae. camptorhynchus</i>          | MN689047         |
| BH2193       | Victoria                        | 1974            | <i>Cx. annulirostris</i>           | U73745           |
| MIDITully    | Queensland                      | 2017            | <i>Verrallina</i> species          | MK697273         |
| MIDIB78      | Queensland                      | 2018            | <i>Cx. annulirostris</i>           | MK697274         |
| PNG_BFV      | Papua New Guinea                | April 2014      | <i>Homo sapiens</i>                | MN115377         |

**Supplementary Table 2.** Observed amino acid substitutions that were unique to one of the three Barmah Forest virus (BFV) genotypes (G1–3). The gene region in which these substitutions were observed has been listed.

| Amino Acid Substitution | Gene region | Genotype                                       |
|-------------------------|-------------|------------------------------------------------|
| S463P                   | nsP1        | G1                                             |
| A472E                   | nsP1        | G1                                             |
| A492V                   | nsP1        | G2                                             |
| E521D                   | nsP1        | G1                                             |
| K138Q                   | nsP2        | G3                                             |
| I268L                   | nsP2`       | G3                                             |
| T484M                   | nsP2        | G1                                             |
| R537K                   | nsP2        | G3                                             |
| L764F                   | nsP2        | G1                                             |
| S798N                   | nsP2        | G3                                             |
| G244S                   | nsP3        | G1                                             |
| L247V                   | nsP3        | G3, except SW94457 - had deletion at this site |
| V373I                   | nsP3        |                                                |
| T384I                   | nsP3        |                                                |
| V737I                   | nsP3        |                                                |
| S443A                   | nsP3        |                                                |
| H92R                    | nsP4        | G1                                             |
| P93S                    | nsP4        | G1                                             |
| R111L                   | nsP4        | G2                                             |
| K118E                   | nsP4        | G1                                             |
| R167K                   | nsP4        | G1                                             |
| K422R                   | nsP4        | G3                                             |
| S90P                    | C           | G1                                             |
| D52E                    | E3          | G2                                             |
| A221T                   | E2          | G1                                             |
| V281A                   | E2          | G1                                             |
| N303S                   | E2          | G2                                             |
| F382L                   | E2          | G3                                             |
| N72S                    | E1          | G1                                             |
| V260I                   | E1          | G2                                             |

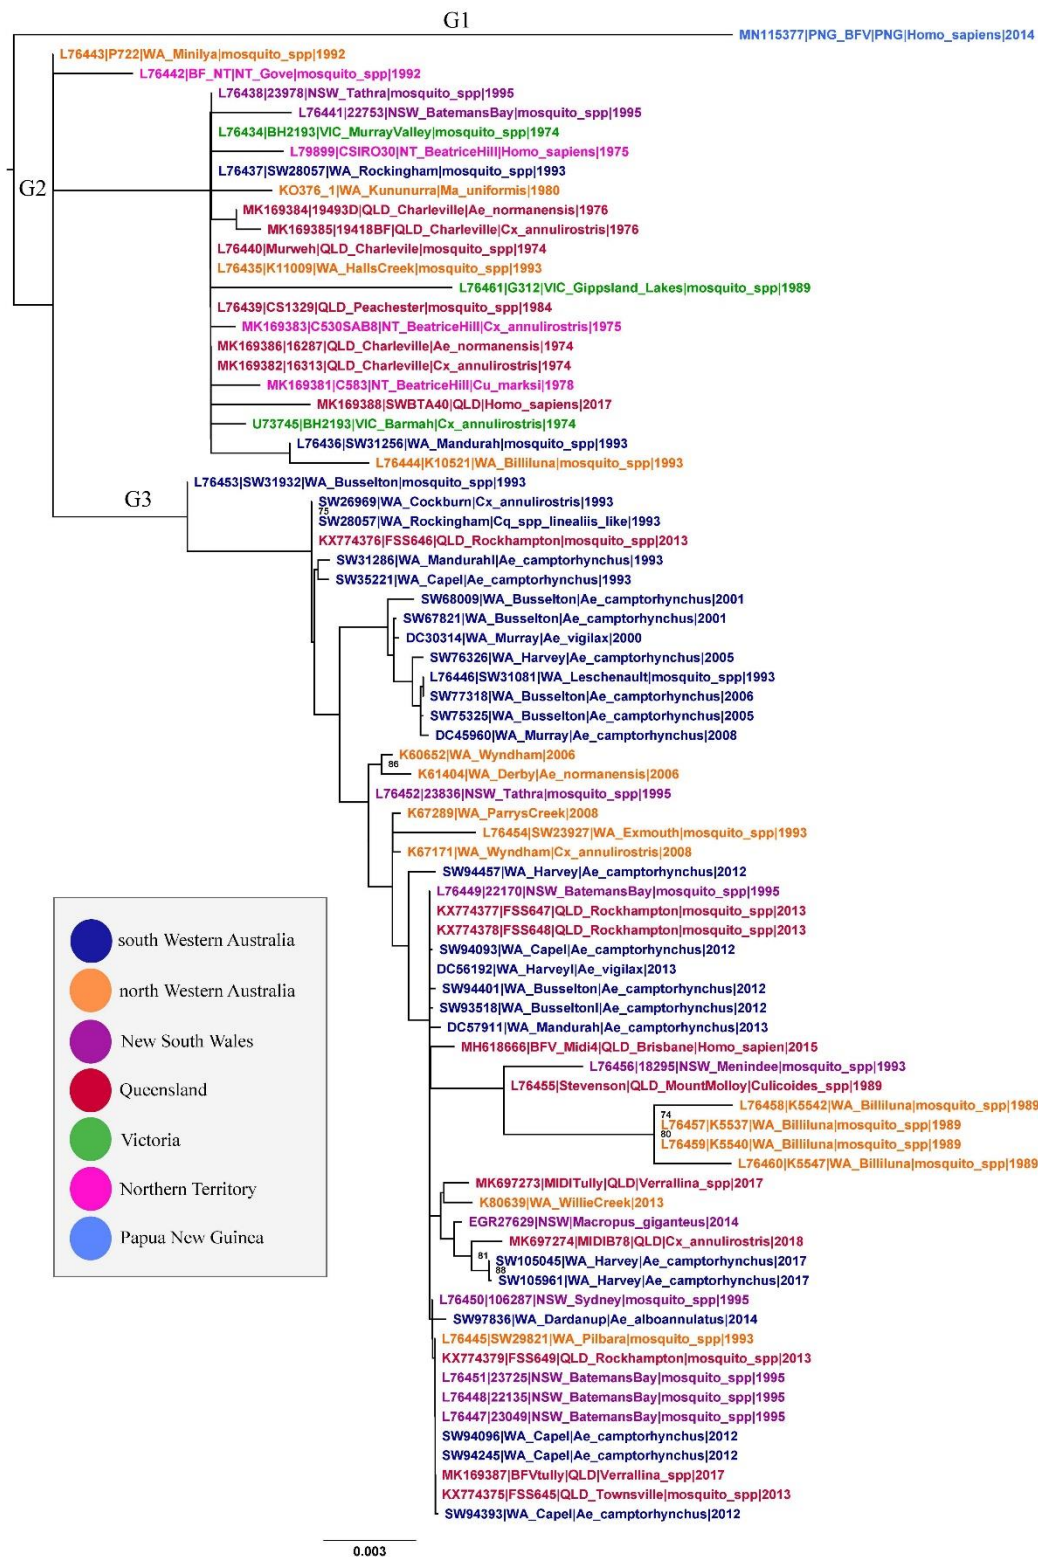

**Supplementary Figure 1.** Midpoint rooted maximum likelihood phylogeny of the 34-taxon Barmah Forest virus dataset, aligned with all available whole or partial E2 gene sequences that were geographically defined. Taxa are coloured for their geographical origin (see key). Bootstrap values >70% are shown above supported nodes (\*).

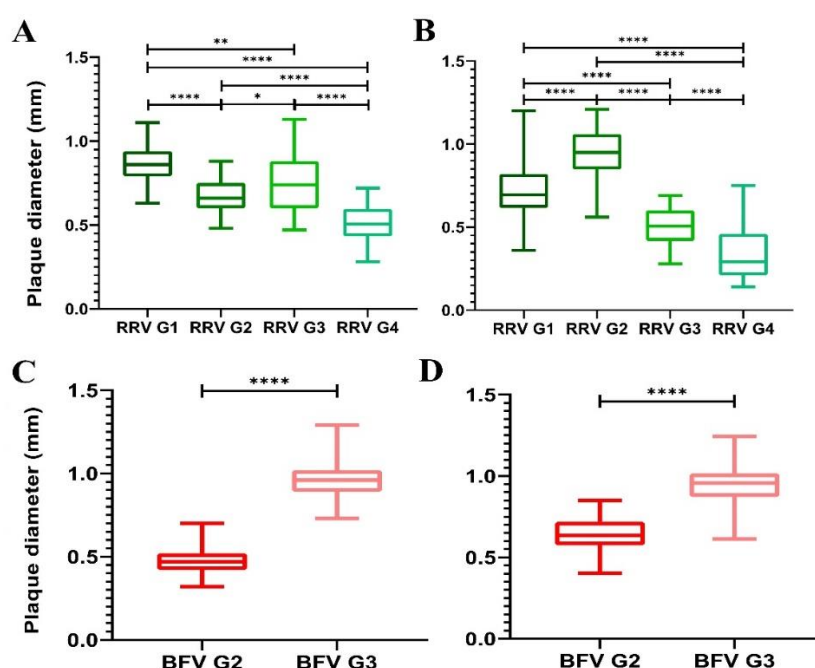

**Supplementary Figure 2.** Size comparison of plaques produced from C6/36 and Vero cell culture supernatant, collected during infection with representatives of Ross River virus (G1–4) and Barmah Forest virus (G2–3) genotypes. All culture supernatant was inoculated onto Vero cell monolayers for plaque assay quantification. **A**) Comparison of plaque size between RRV G1–4 from C6/36 cell supernatant **B**) Comparison of plaque size between RRV G1–4 from Vero cell supernatant **C**) Comparison of plaque size between BFV G2–3 from C6/36 cell supernatant **D**) Comparison of plaque size between BFV G2–3 from Vero cell supernatant. Significance values are shown above comparative datasets ( $p \leq 0.0001$ ; \*\*\*\*,  $p \leq 0.001$ ; \*\*\*,  $p \leq 0.01$ ; \*\*,  $p \leq 0.05$ ; \*).

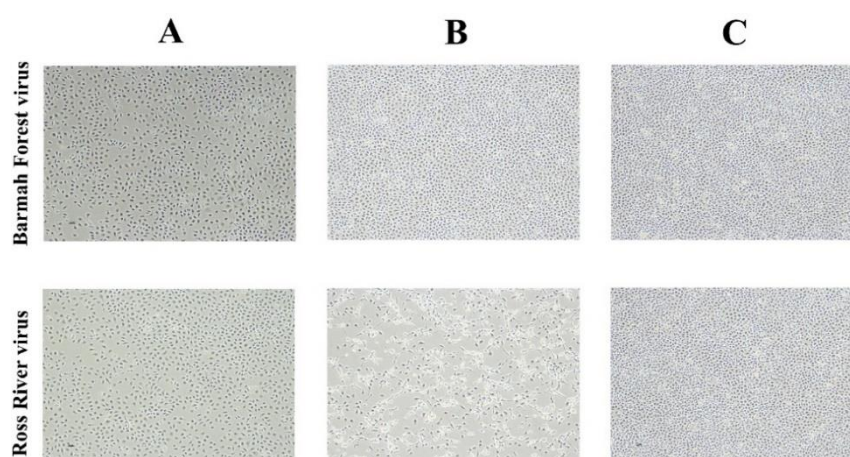

**Supplementary Figure 3.** C6/36 cells at different time points of Ross River virus (lower panel) and Barmah Forest virus (upper panel) infection. **A**) presents cells prior to virus inoculation. **B**) presents cells 48-hours post infection. **C**) presents the virus-free negative control cells at 48-hours post-mock infection. Data shown is infection with G1 of RRV and G3 of BFV, as representatives. These observations were consistent between all RRV and BFV variants studied
